# Supplementary material for: Investigation of Programmable Friction with Ionic Liquid Mixtures at the Nano- and Macroscales
Source: MDPI journal article supplement (doi:10.3390/lubricants11090376), 2023-09-05
Supplement: s1 [file s1]

Archive with 1 entries (1 files):
- lubricants-2457072-supplementary.pdf
